# Supplementary material for: Flexible time course of spatial frequency use during scene categorization
Source: Springer Nature journal article supplement (doi:10.1038/s41598-021-93252-2), 2021-07-07
Supplement: MOESM3 [file 41598_2021_93252_MOESM3_ESM.pdf]

## **Flexible Time Course of Spatial Frequency Use During Scene Categorization**

Sandro L. Wiesmann<sup>1\*</sup>, Laurent Caplette<sup>2</sup>, Verena Willenbockel<sup>1,3</sup>,

Frédéric Gosselin<sup>2</sup>, and Melissa L.-H. Võ<sup>1</sup>

<sup>1</sup>Department of Psychology, Johann Wolfgang Goethe-Universität, Frankfurt, Germany

<sup>2</sup>Department of Psychology, Université de Montréal, Montréal, QC, Canada

<sup>3</sup>Department of Psychology, University of Victoria, Victoria, BC, Canada

\*Corresponding author. Email: [wiesmann@psych.uni-frankfurt.de](mailto:wiesmann@psych.uni-frankfurt.de).

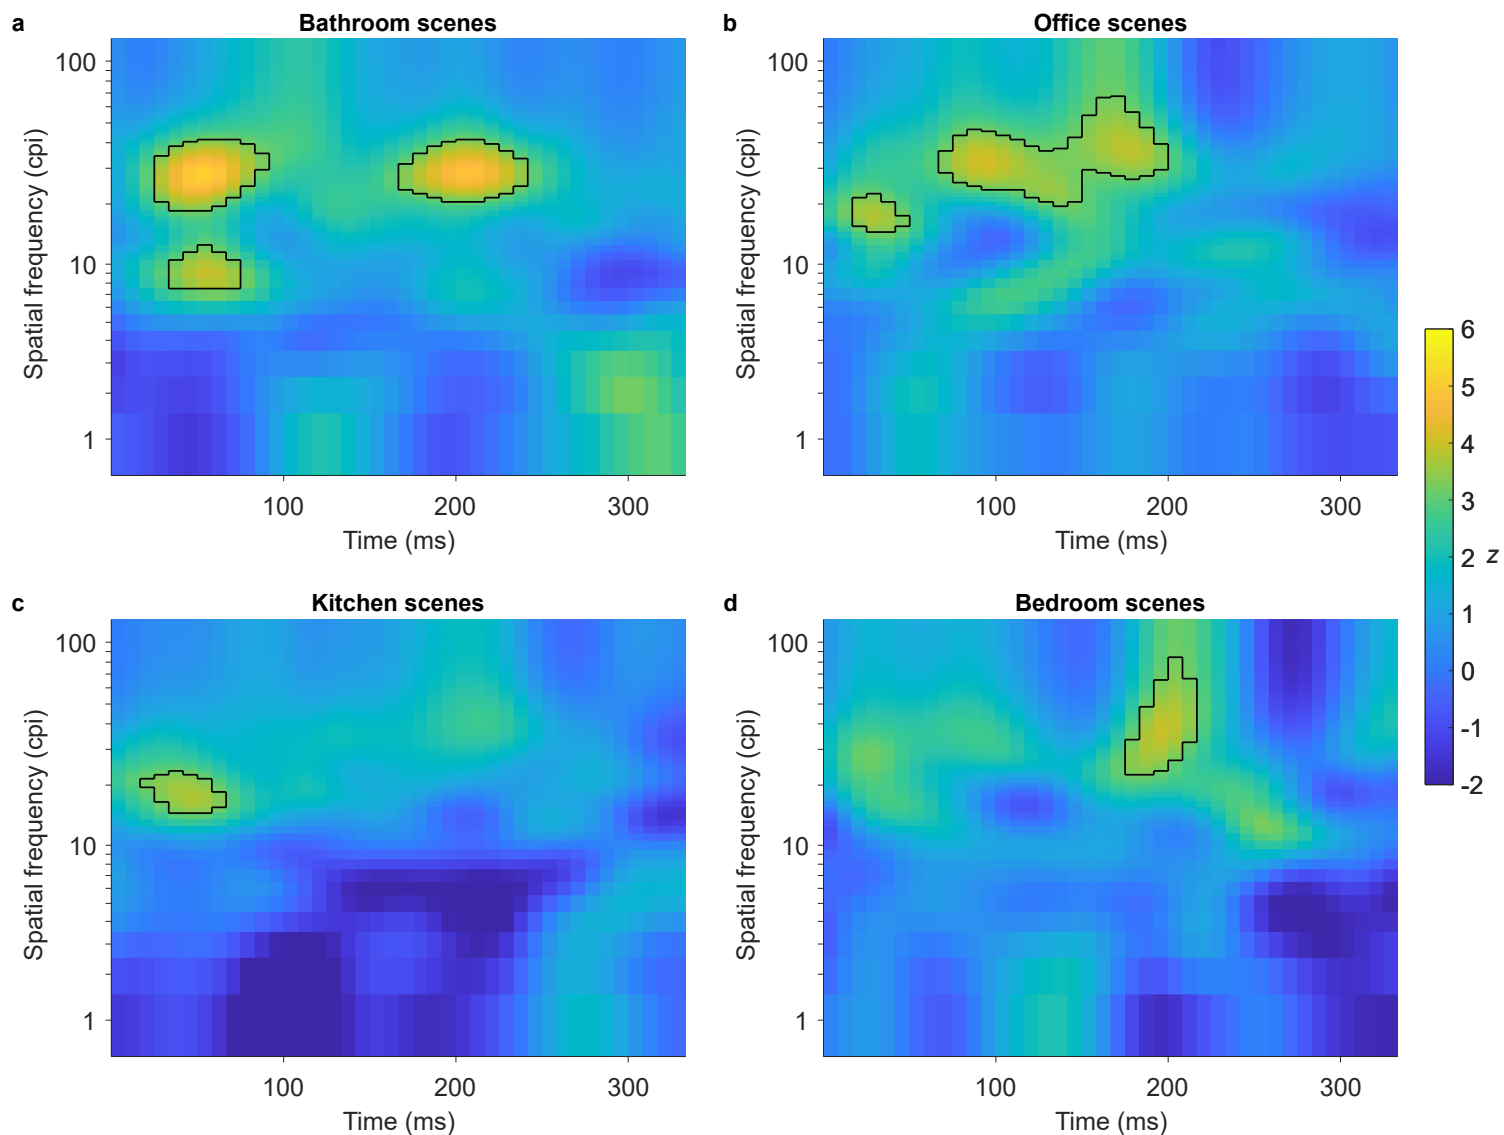

*Supplementary Figure S1.* Group classification images obtained from the SF-Bubbles analysis of accuracy data in Experiment 1 for subsets of (a) bathroom, (b) office, (c) kitchen, and (d) bedroom scenes. Each pixel indicates how the presentation of a spatial frequency at a given time point correlates with accuracy in the categorization task. Pixels enclosed by black lines are significant predictors for correct responses. cpi = cycles per image.

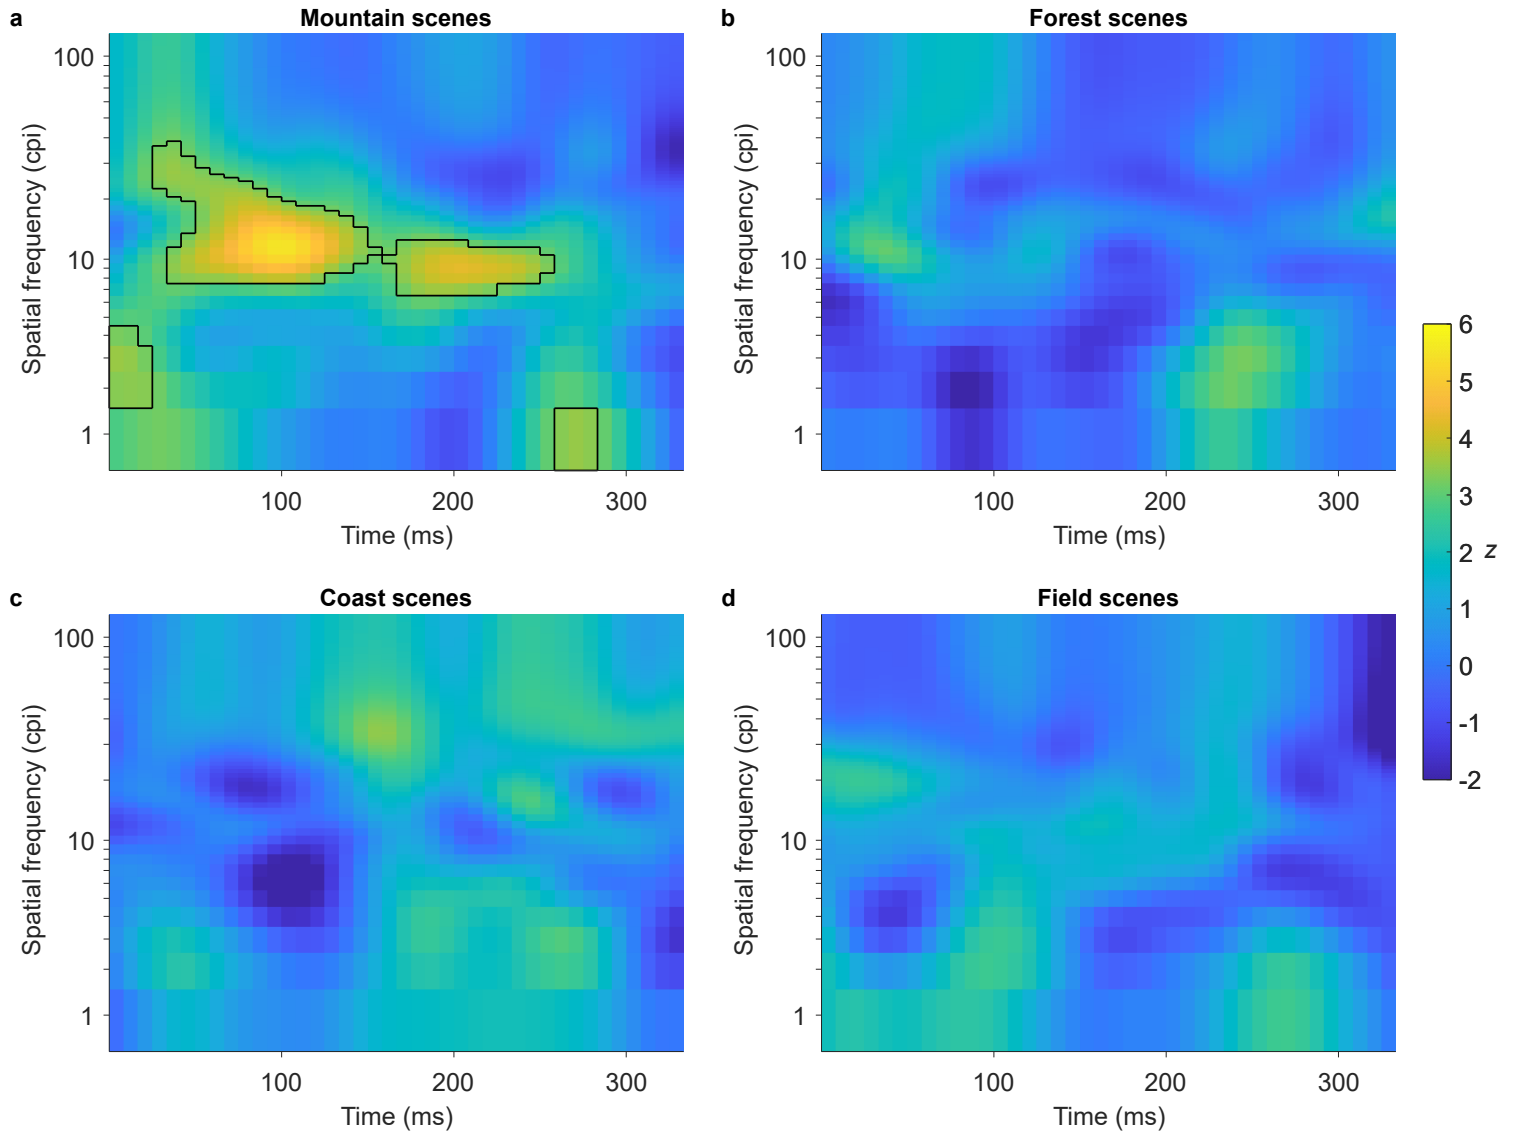

*Supplementary Figure S2.* Group classification images obtained from the SF-Bubbles analysis of accuracy data in Experiment 2 for subsets of (a) mountain, (b) forest, (c) coast, and (d) field scenes. Each pixel indicates how the presentation of a spatial frequency at a given time point correlates with accuracy in the categorization task. Pixels enclosed by black lines are significant predictors for correct responses. cpi = cycles per image.

*Supplementary Video S1.* Example of a stimulus video used in the experiments. Random SFs are revealed at random time points.

*Supplementary Video S2.* Example of a stimulus video used in the experiments (slowed down to a quarter of the original speed for illustration). Random SFs are revealed at random time points.
